# Supplementary material for: USP45 and Spindly are part of the same complex implicated in cell migration
Source: PubMed Central journal article supplement (PMC6158257; doi:10.1038/s41598-018-32685-8), 2018-09-26

# **USP45 and Spindly are part of the same complex implicated in cell migration**

Claudia Conte<sup>1,&</sup>, Eric R. Griffis<sup>1,¶</sup>, Ian Hickson<sup>2,\$</sup>, Ana B. Perez-Oliva<sup>1\*</sup>

## **Supplementary Figures**

### **Supplemental Figure 1. Quantification of FRB-FKBP system.**

Measurements conducted for USP45 mis-localisation recruitment at the plasma membrane; values were obtained by drawing a line between the two edges of the cell and then the fluorescence intensity was measured using a plug-in in Fiji (multichannel plug-in) and plotted with Excel. Similar measurements were conducted for all the USP45 mutants tested. For each experiment 50 cells were measured and then the average values for each channel were plotted. All experiments were performed at least three times and a representative example is shown.

### **Supplemental Figure 2. Analysis of polyubiquitylation of Spindly and USP45 ubiquitin type specificity.**

- (A) HEK293 cells treated with lactacystin (5 $\mu$ M) for 6 hours and lysed with a buffer containing 0.1 M N-ethylmaleimide. Samples lysated to explore polyubiquitylation of Spindly. Immunoblotting with total ubiquitin antibody and Spindly.
  - (B) Ability of bacterial expressed recombinant full length USP45 WT and USP45 mutant C199A to hydrolyse Ub-Rho110-G was assessed in presence and absence of immunoprecipitated Spindly-FLAG. Values determined at t = 60 min were plotted. Three independent experiments were performed and data in the graph represent means  $\pm$  s.d. Student t-test was used to determine the statistical significance.
  - (C) Ability of recombinant USP45 WT and C199A mutant to cleave 8 dimers of ubiquitin at t = 60min.
  - (D) Time course activity of USP45 WT or catalytic inactive C199A at time indicated against K6, K48 and K63 ubiquitin dimers.
- (A-D) All experiments were performed at least three times and a representative example is shown.

### **Supplemental Figure 3. Analysis of polyubiquitylation of Spindly interactors.**

HEK293 cells were transfected with Spindly-FLAG. Spindly-FLAG was immunoprecipitated and treated in the absence or presence of 10 ng of recombinant USP45 wild-type (WT) or catalytic inactive USP45 (C199A). The immunoprecipitates were resolved on a polyacrylamide gel and subjected to immunoblotting with the indicated antibodies. Arrows indicate the molecular weight of each protein. Non-specific bands are indicated with \*. All experiments were performed at least three times and a representative example is shown.

**Supplemental Figure 4. Mutants to explore site of mono-ubiquitylation of Spindly.**

HEK293 cells transfected with FLAG constructs: Spindly WT or single mutant K115R or K117R or double mutant (K115R and K117R) were analysed by immunoblotting with FLAG monoclonal antibody. All experiments were performed at least three times and a representative example is shown.

**Supplemental Figure 5. USP45 does not play a role in mitotic division.**

U2OS cell lines expressing USP45 WT or KO were analysed for positive expression of phospho-H3 as a marker for mitotic division. The figure indicates that the absence of USP45 does not affect the presence of phospho-H3 as indicated from the % of total of cells positive for phospho-H3 (no significance difference). Three independent experiments were performed and data in the graph represent means  $\pm$  s.d. Student t-test was used to determine the statistical significance. Scale bars: 5 $\mu$ m.

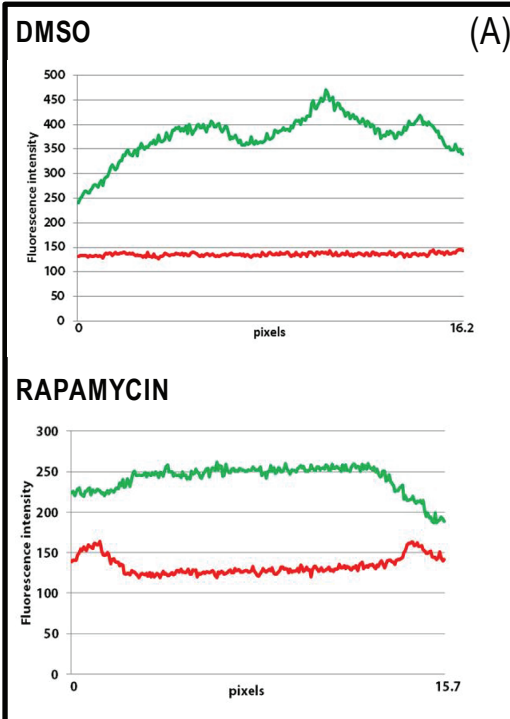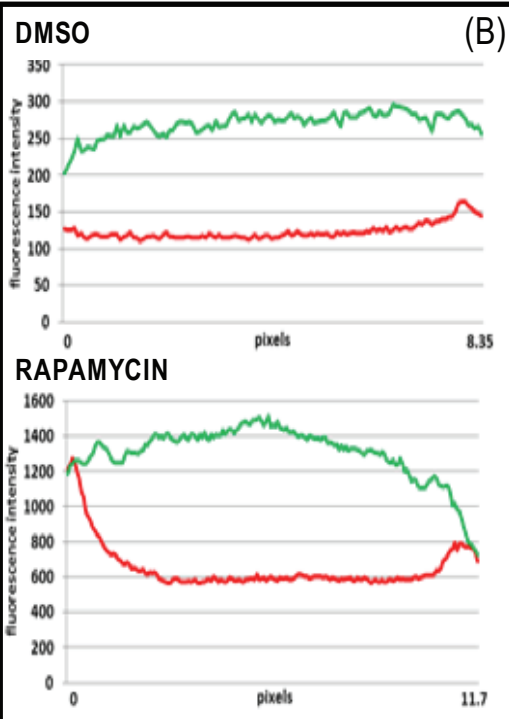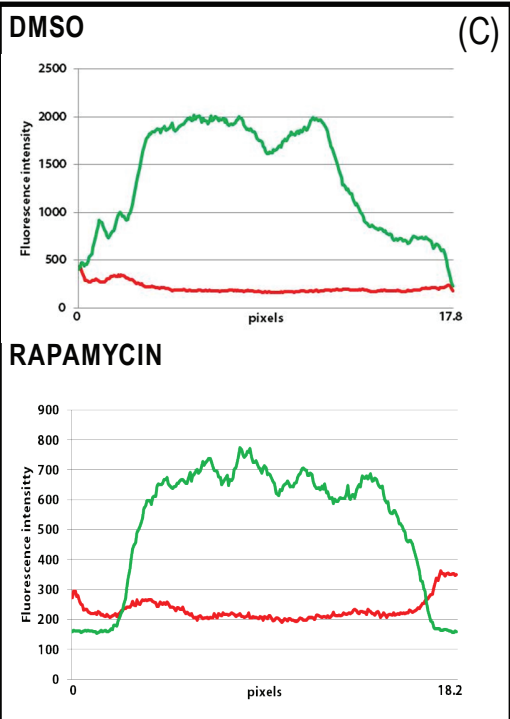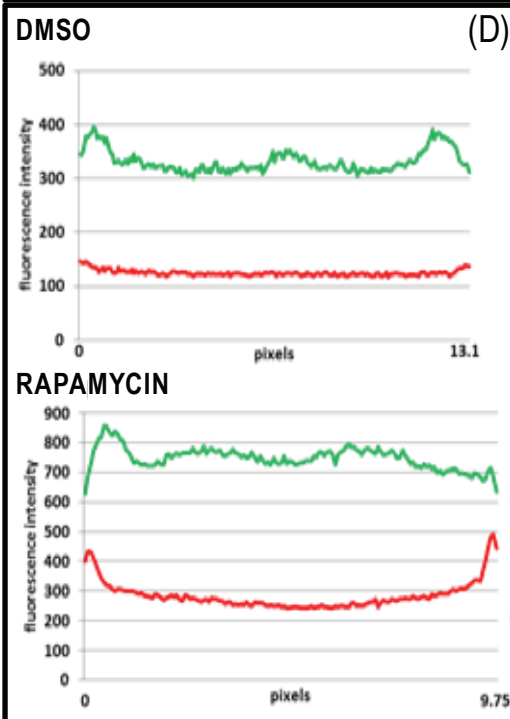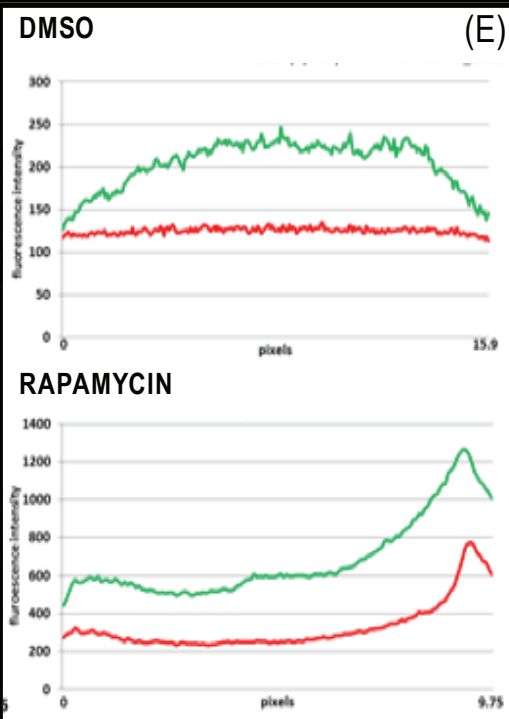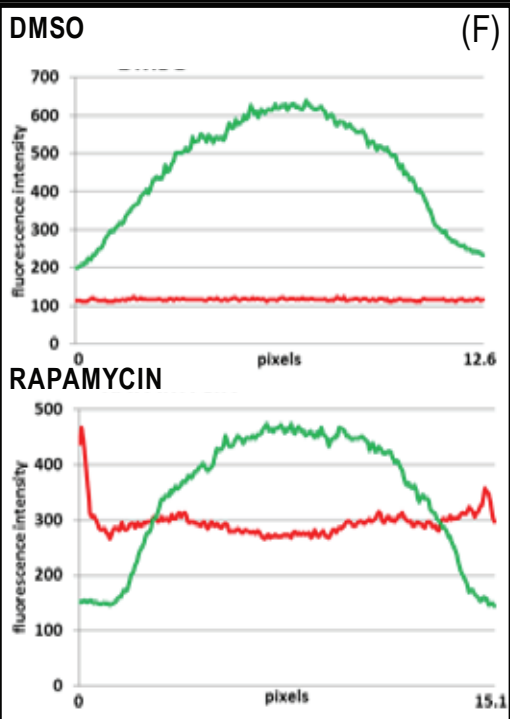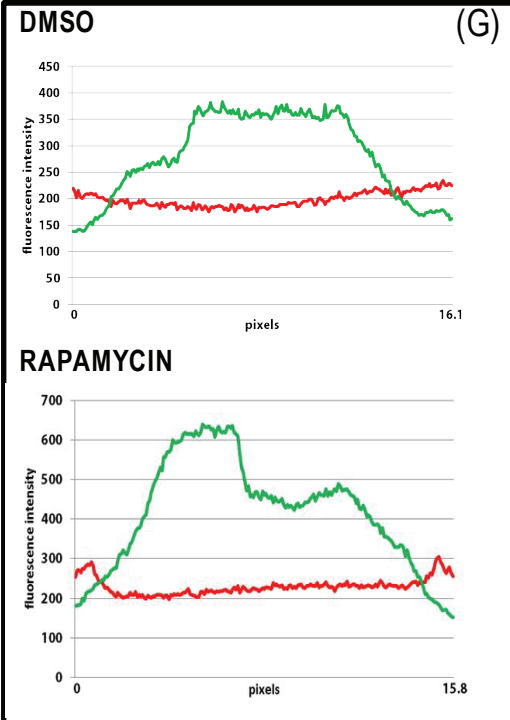

(A) GFP-empty  
 (B) GFP-USP45\_WT  
 (C) GFP-USP45\_C199A  
 (D) GFP-USP45\_61end  
 (E) GFP-USP45\_189end  
 (F) GFP-USP45\_1-171  
 (G) GFP-USP51

— GFP-USP45 variants  
 — mCh-Spindly

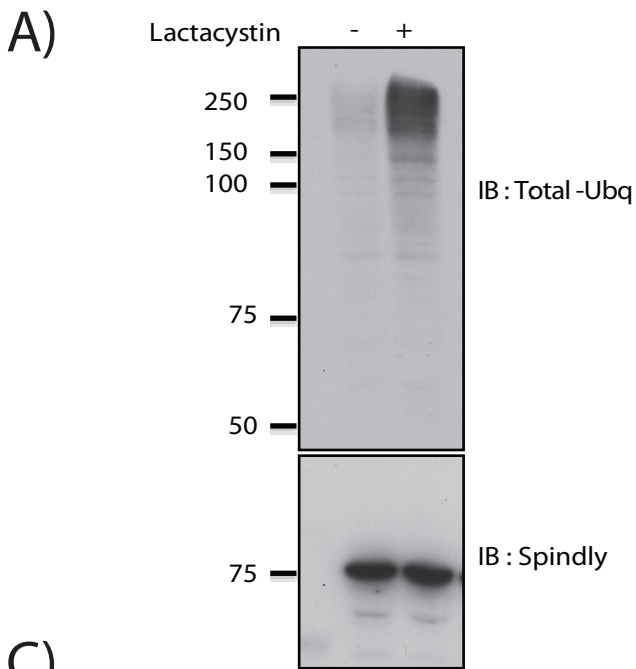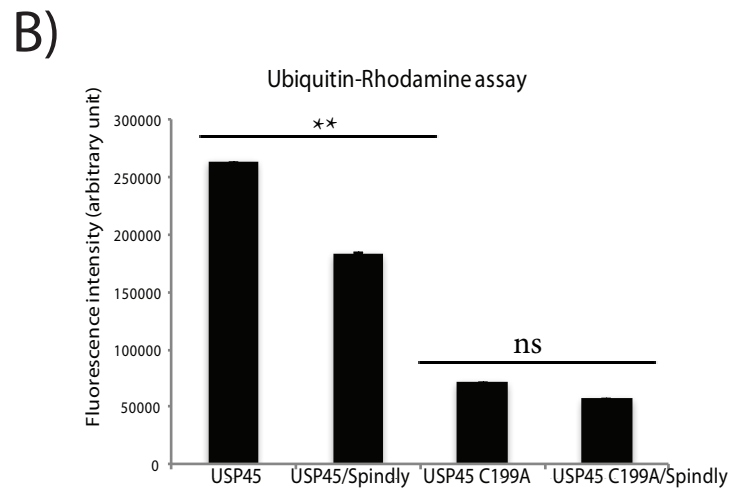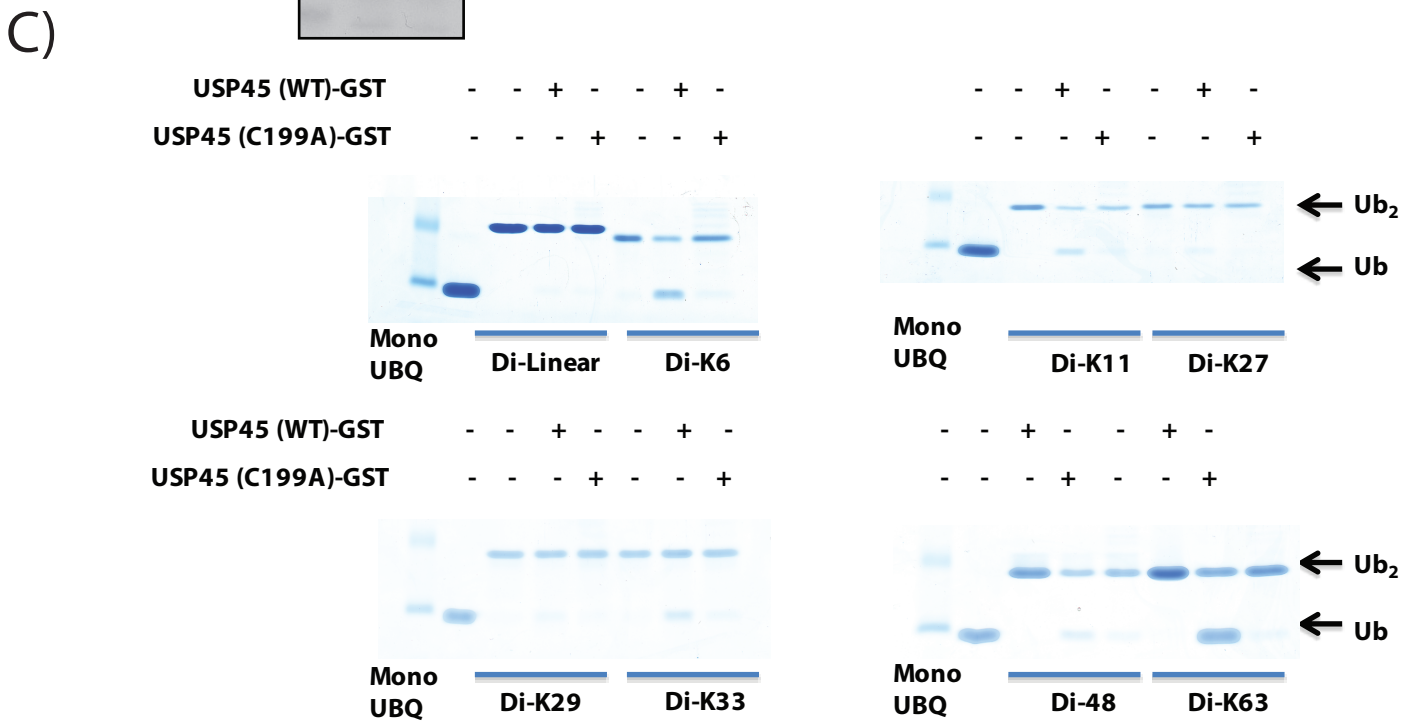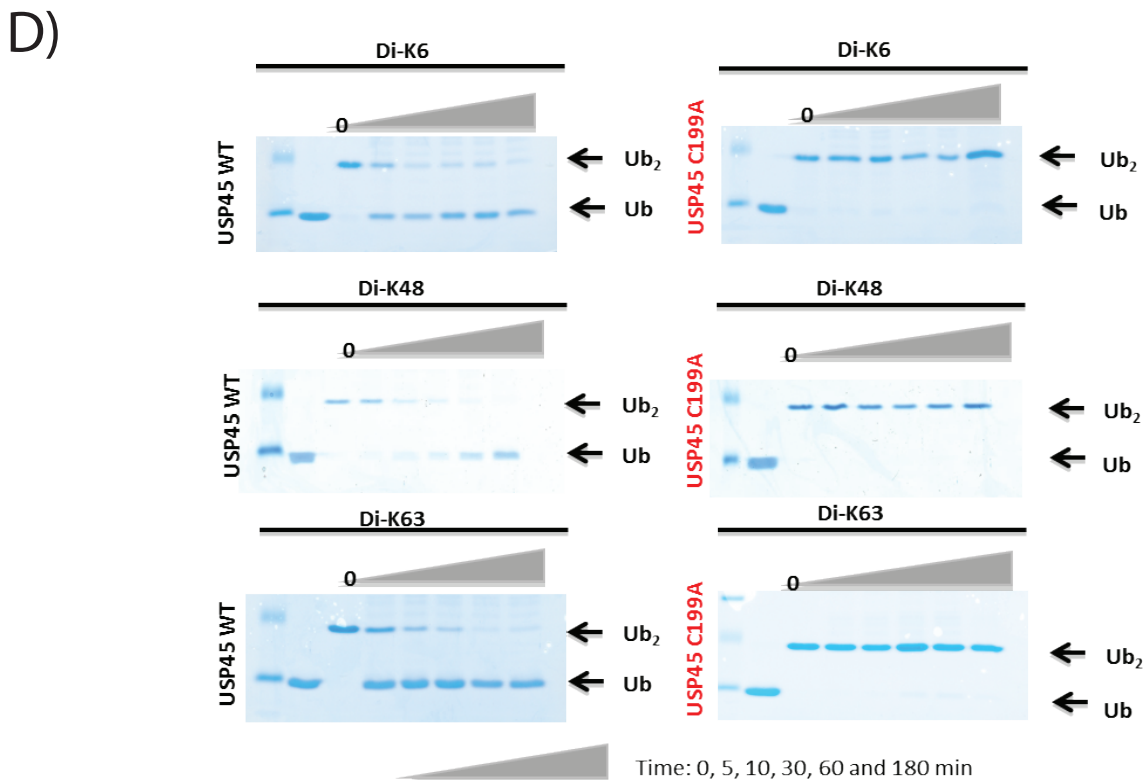



A)

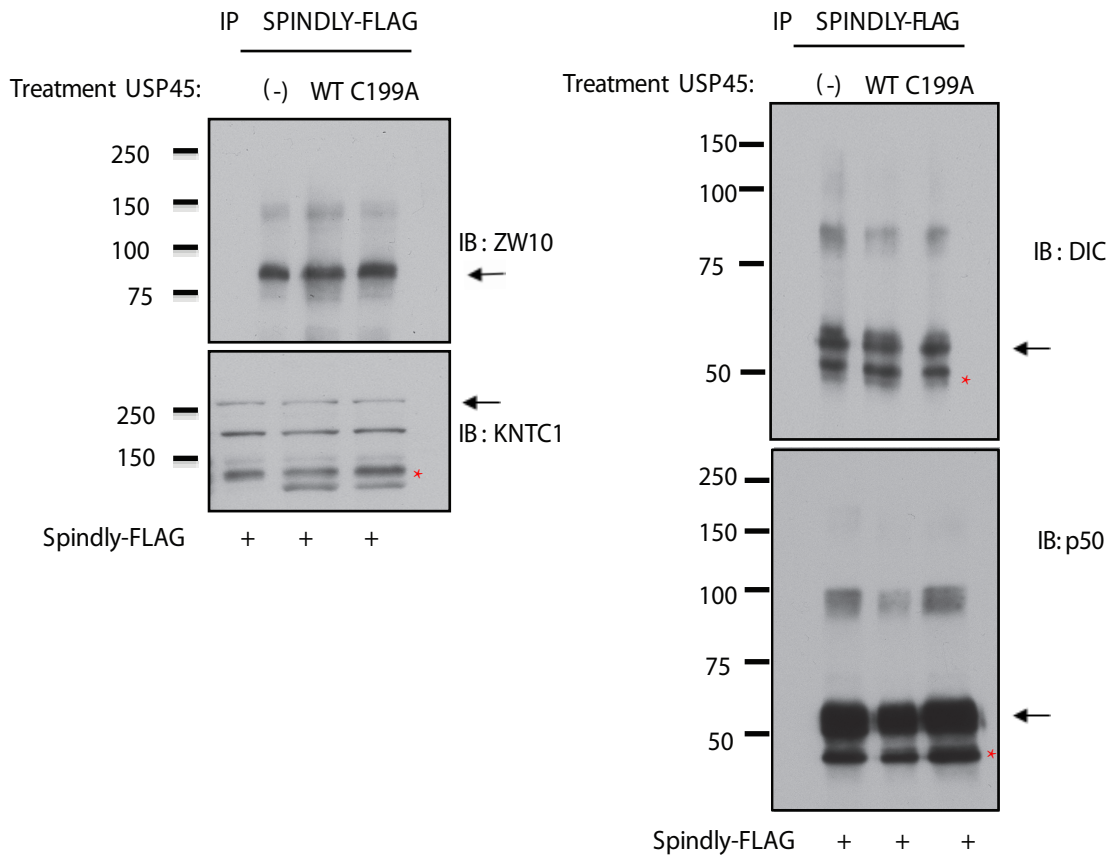

A)

|                     | Input |   |   |   | IP FLAG |   |   |   |
|---------------------|-------|---|---|---|---------|---|---|---|
| Spindly WT          | +     | - | - | - | +       | - | - | - |
| Spindly K115R       | -     | + | - | - | -       | + | - | - |
| Spindly K117R       | -     | - | + | - | -       | - | + | - |
| Spindly K115R+K117R | -     | - | - | + | -       | - | - | + |

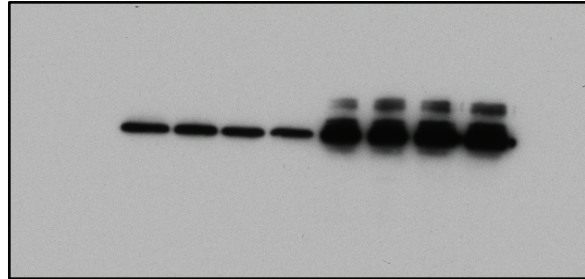

←  
IB: Spindly-FLAG

A)

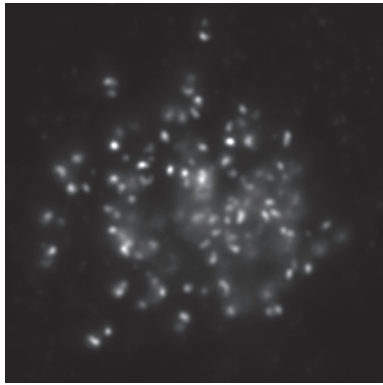

WT

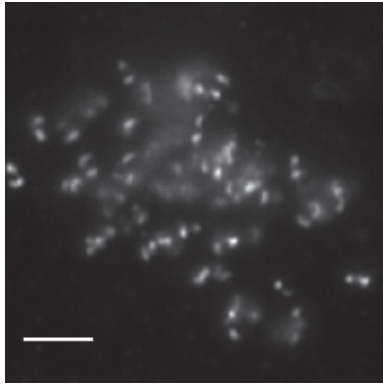

USP45 KO

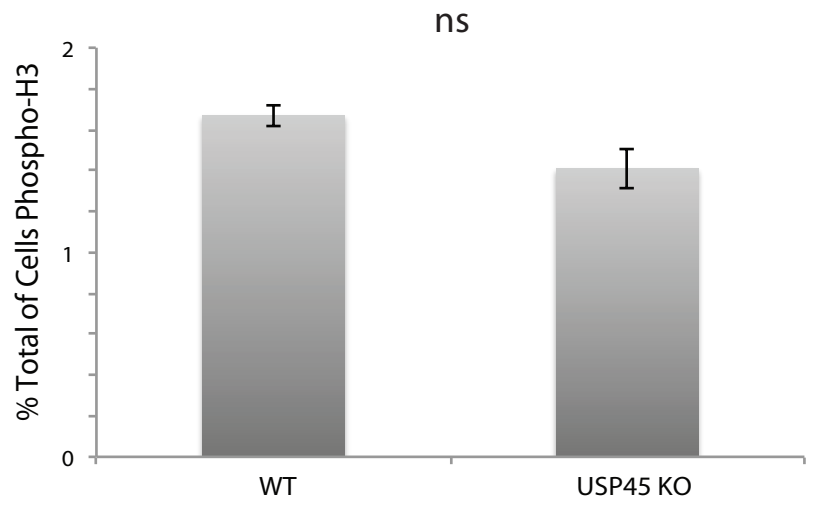

Supplement: 41598_2018_32685_MOESM1_ESM.pdf [file 41598_2018_32685_MOESM1_ESM.pdf]
