# Supplementary material for: USP45 and Spindly are part of the same complex implicated in cell migration
Source: PubMed Central journal article supplement (PMC6158257; doi:10.1038/s41598-018-32685-8), 2018-09-26

# Original Blots

Figure 1B

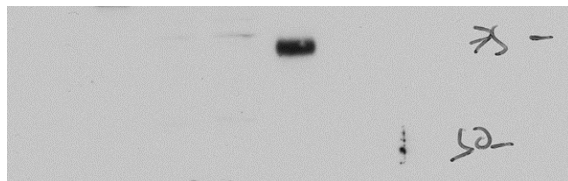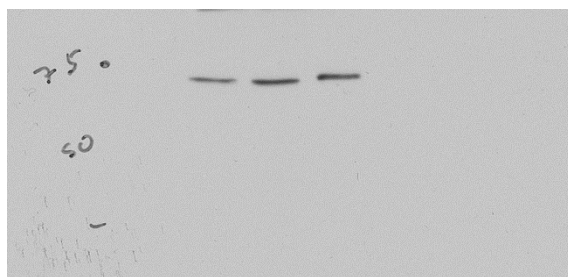

Figure 1E

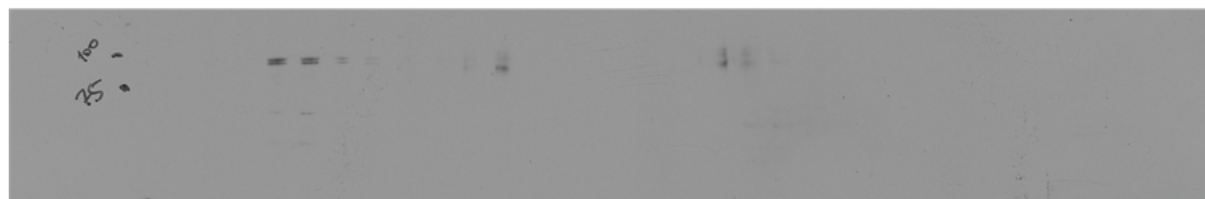

USP45

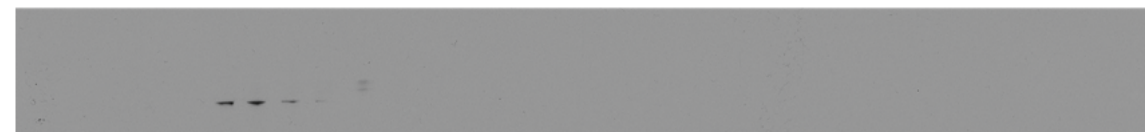

SPINDLY

Figure 1D

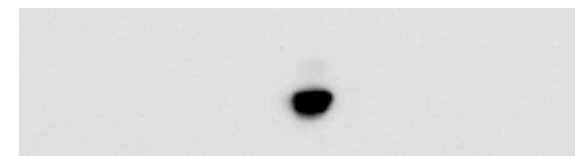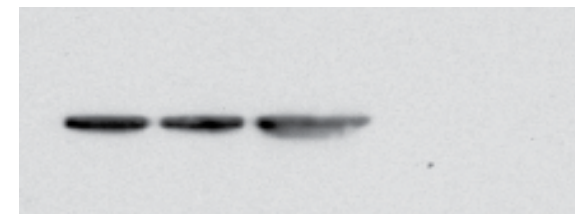

Figure 1F

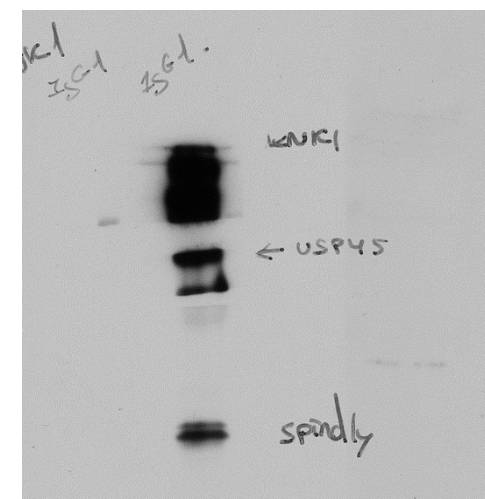

Figure 1

Figure 2A

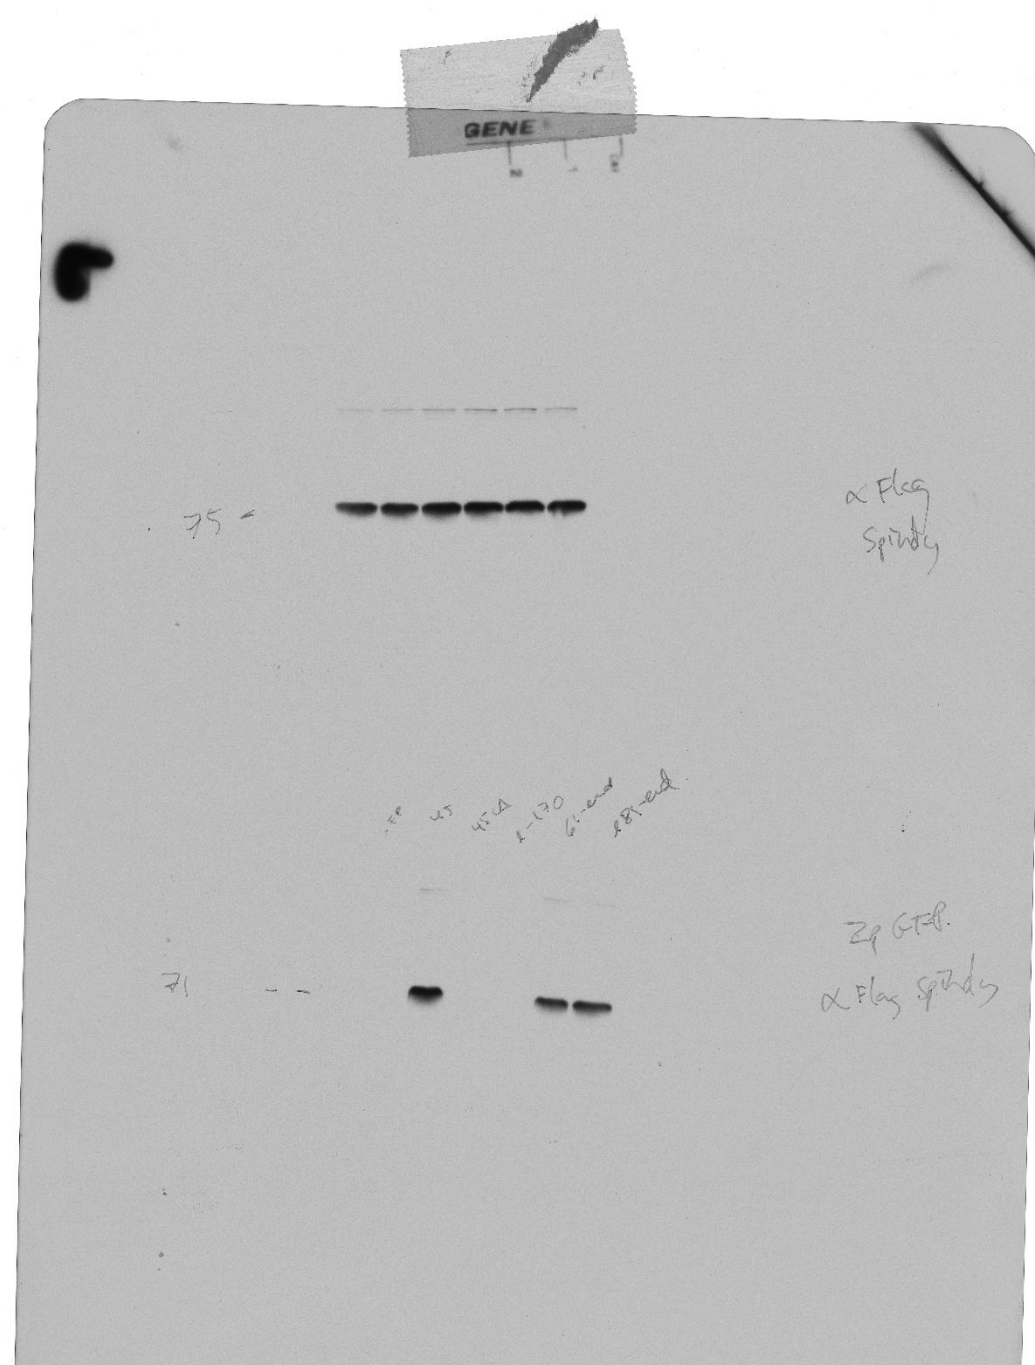

Figure 2

Figure 3A

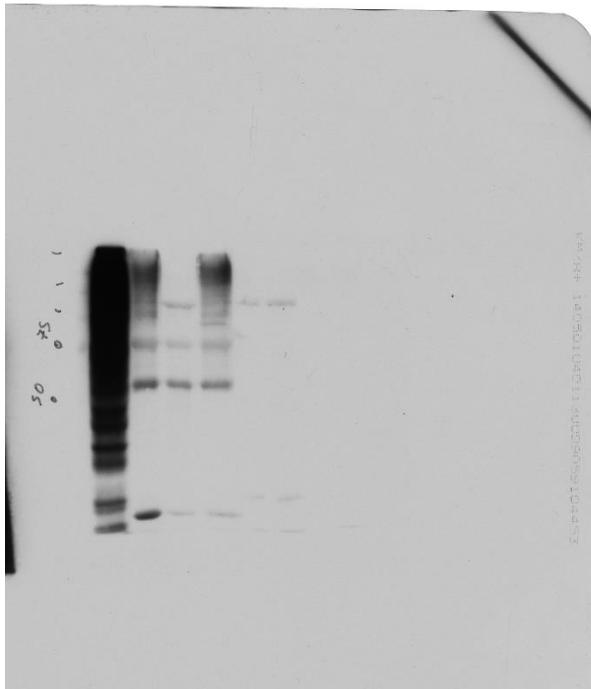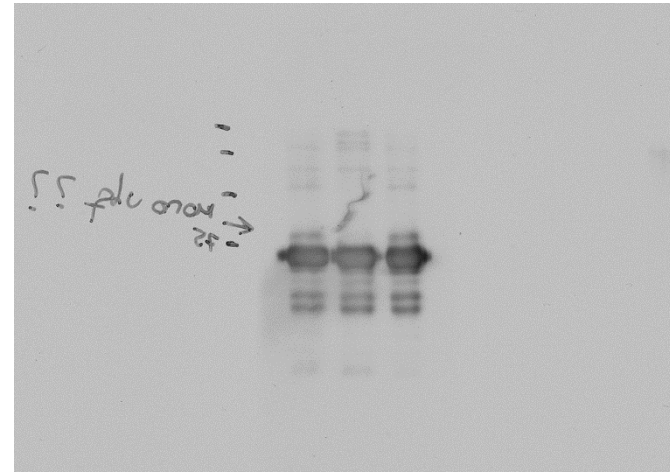

Figure 3B

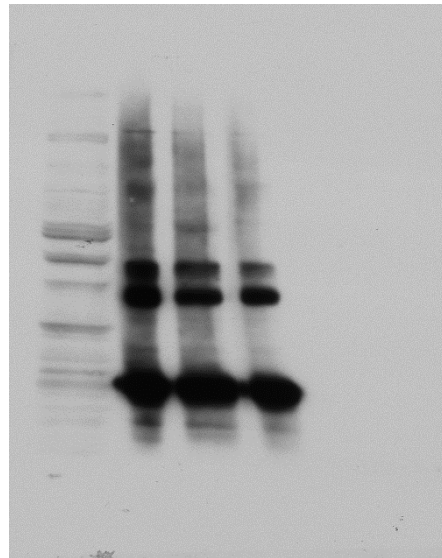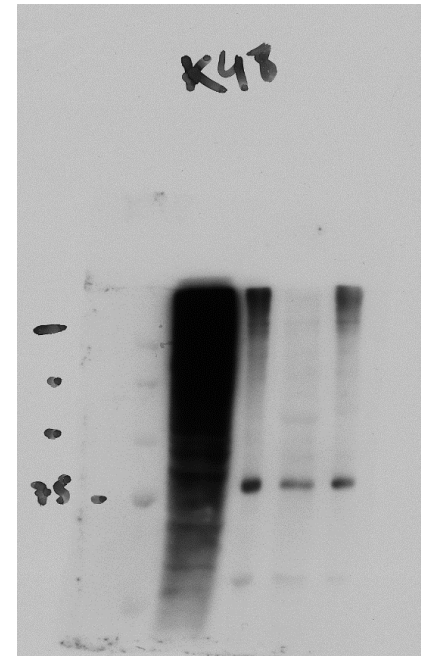

Figure 3

Figure 4B

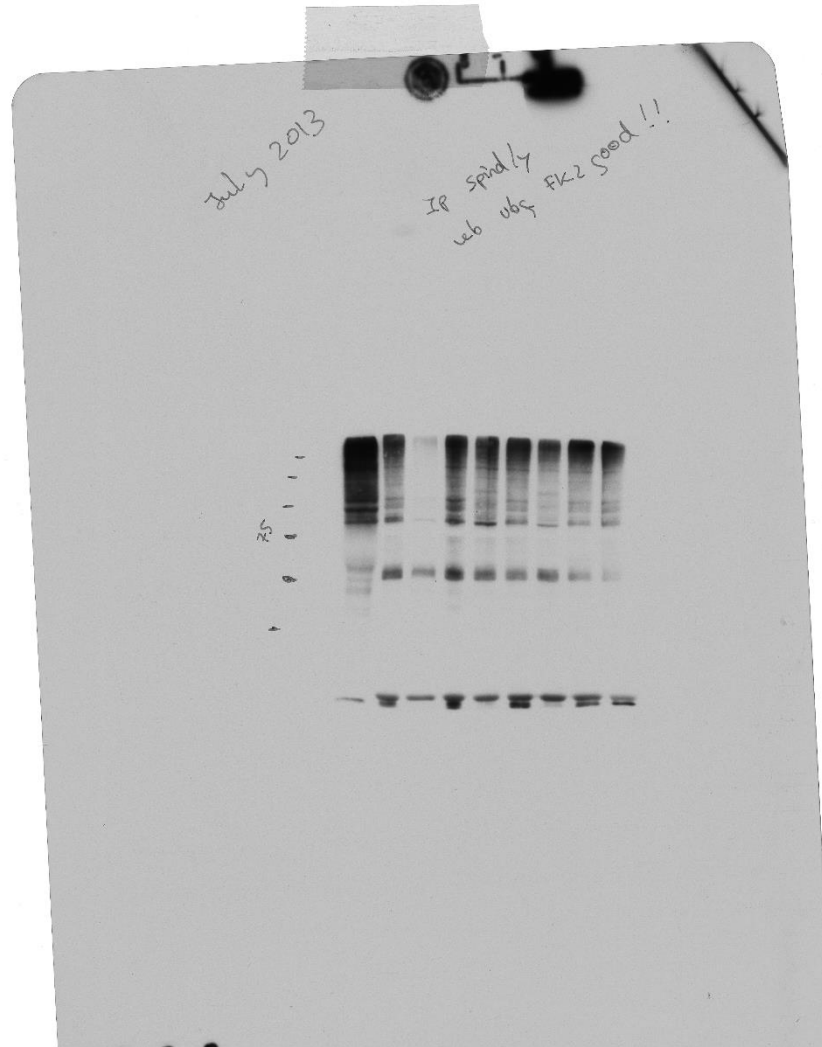

Figure 4A

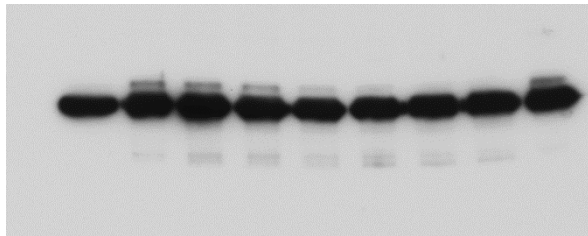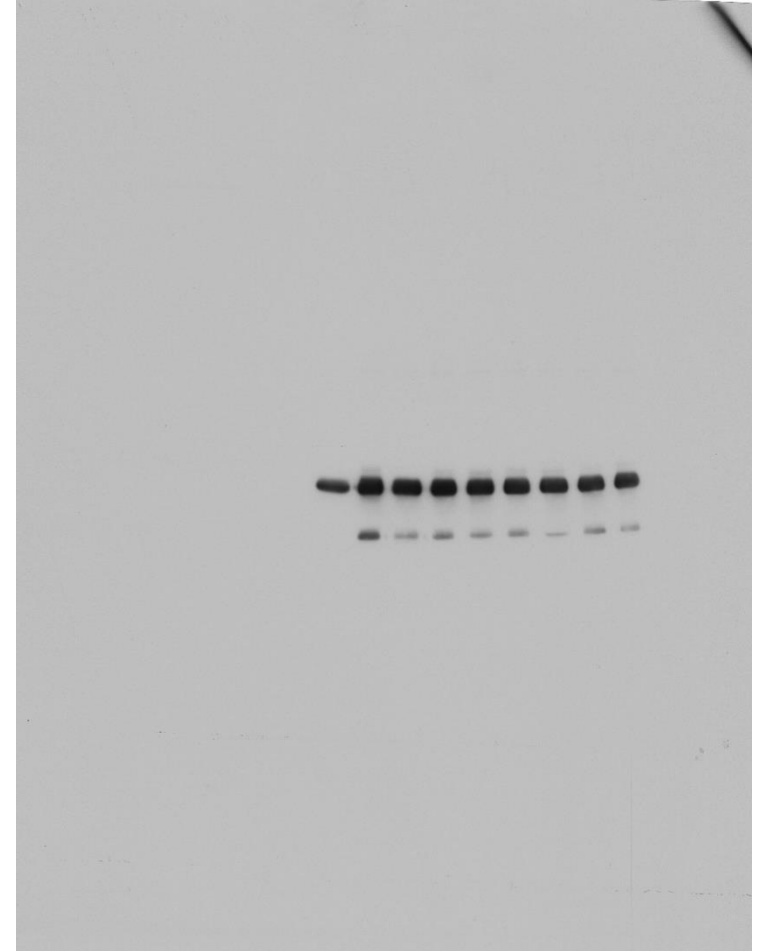

Figura 4

Supp Figure 2

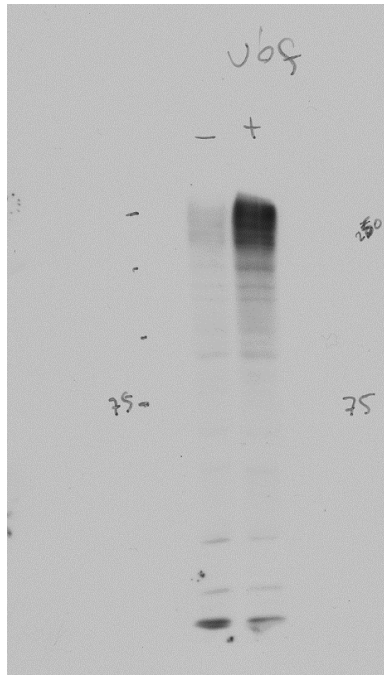

KNTC1

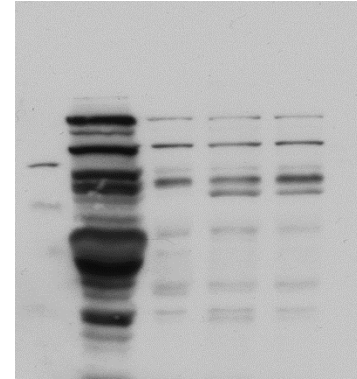

Dynein

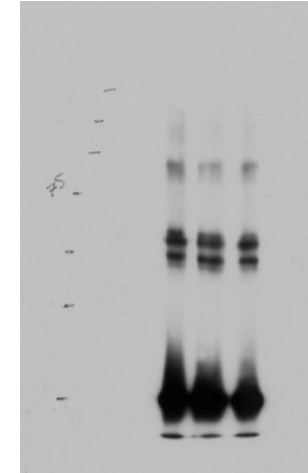

P50

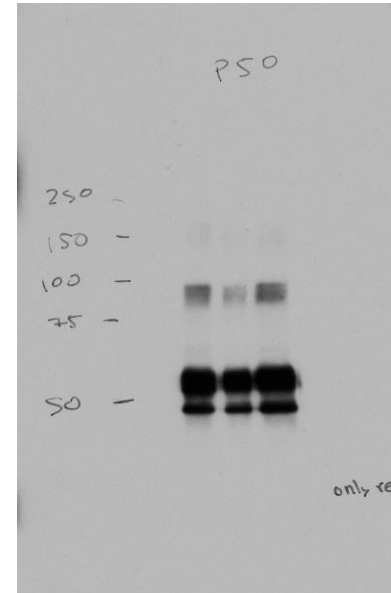

ZW10

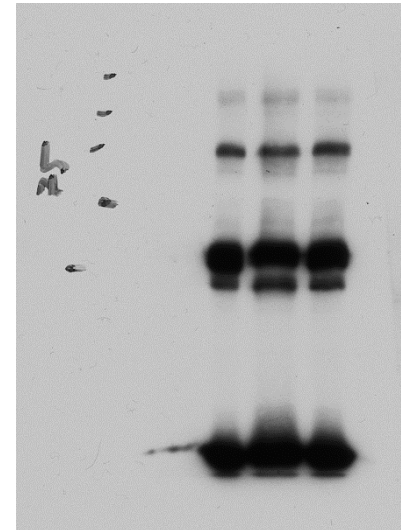

P150

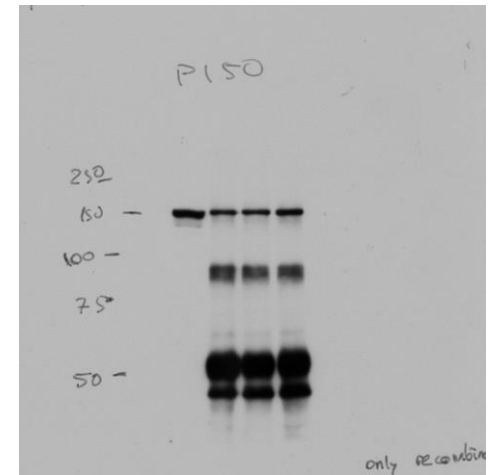

lact  
- +  
WT KO USP15

10 75 150

ub spindy

Supp Figure 2



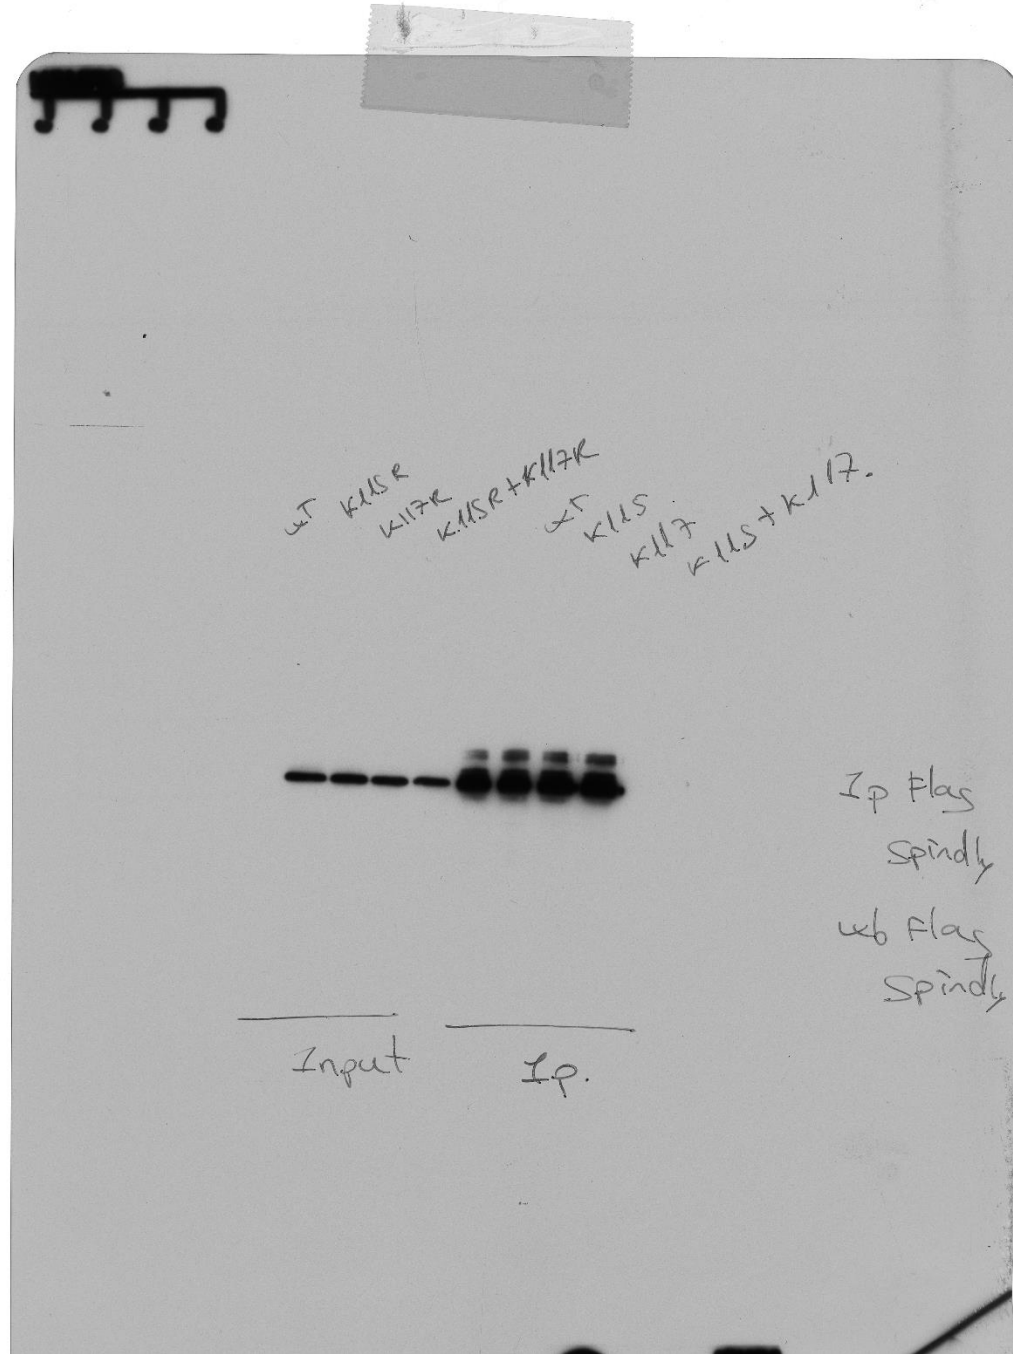

Supp Figure 3

Figure 1G

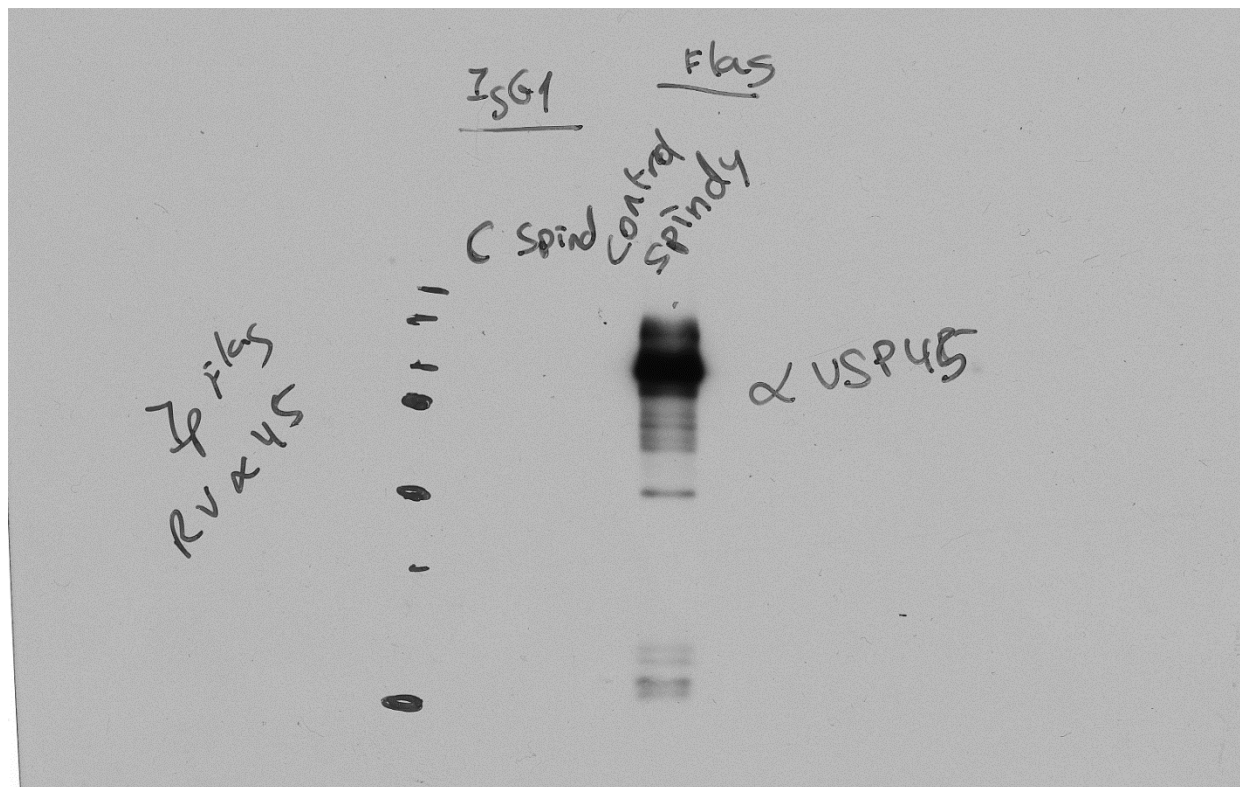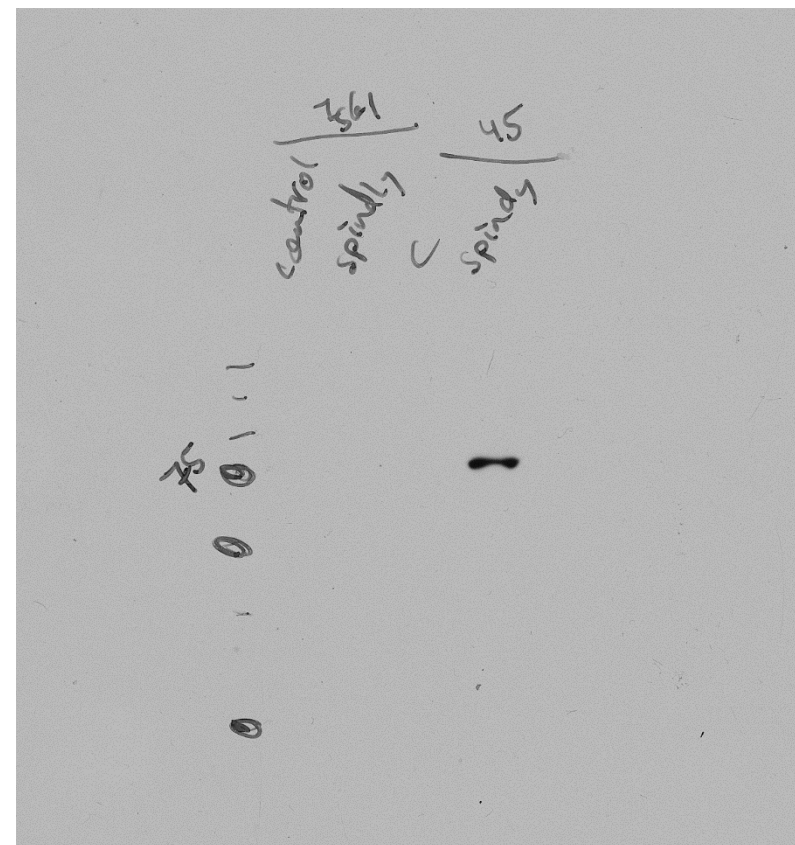



Part of Figure 4A

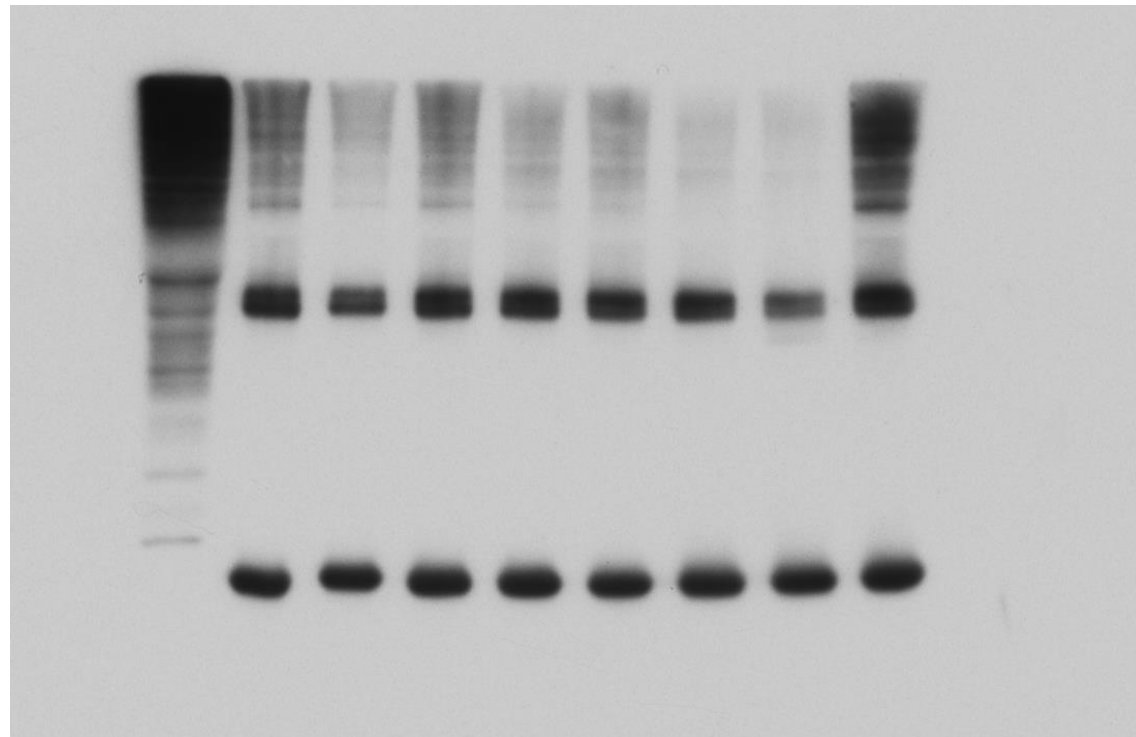

Supplement: 41598_2018_32685_MOESM2_ESM.pdf [file 41598_2018_32685_MOESM2_ESM.pdf]
